# Supplementary material
Source: PubMed Central journal article supplement (PMC124356)
Supplement: pnas_102644799_1.pdf [file pnas_102644799_1.pdf]

Supporting information for Falk *et al.* (May 14, 2002) *Proc. Natl. Acad. Sci. USA*, 10.1073/pnas.102644799.

**Table 1. Incorporation of [<sup>14</sup>C]Xyl from UDP-[<sup>14</sup>C]Xyl (0.2 mM) into newly synthesized XyG by microsomal membranes in presence of UDP-Glc (1 mM) and increasing amount of detergent**

|                   | CMC*  | Type <sup>†</sup> | Detergent concentration           |            |            |            |
|-------------------|-------|-------------------|-----------------------------------|------------|------------|------------|
|                   |       |                   | (% w/v)                           |            |            |            |
|                   |       |                   | <b>0.01</b>                       | <b>0.1</b> | <b>0.4</b> | <b>0.6</b> |
|                   |       |                   | % activity remaining <sup>‡</sup> |            |            |            |
| Digitonin         | 0.005 | N                 | <b>120</b>                        | <b>64</b>  | <b>55</b>  |            |
| Lys- $\alpha$ -PC | 0.005 | Z                 | <b>131</b>                        | <b>54</b>  | <b>16</b>  |            |
| Tween 20          | 0.007 | N                 | <b>125</b>                        | <b>46</b>  | <b>25</b>  |            |
| Triton X-100      | 0.02  | N                 | <b>86</b>                         | <b>5</b>   | <b>6</b>   |            |
| Triton X-114      | 0.02  | N                 | <b>134</b>                        | <b>20</b>  | <b>19</b>  |            |
| CHAPS             | 0.6   | Z                 | <b>81</b>                         | <b>24</b>  | <b>18</b>  | <b>16</b>  |
| CHAPSO            | 0.5   | Z                 | <b>73</b>                         | <b>18</b>  | <b>20</b>  |            |
| SDS               |       | A                 | <b>129</b>                        | <b>8</b>   |            |            |
| Glycodeoxycholate | 0.1   | A                 | <b>127</b>                        | <b>13</b>  | <b>3</b>   |            |
| Glycocholate      | 0.35  | A                 | <b>95</b>                         | <b>10</b>  | <b>12</b>  | <b>6</b>   |
| Taurocholate      | 0.3   | A                 | <b>59</b>                         | <b>3</b>   | <b>5</b>   | <b>3</b>   |
| Zwittergent 3-14  | 0.01  | Z                 | <b>11</b>                         | <b>2</b>   |            |            |
| Brij 58           | 0.008 | N                 | <b>22</b>                         | <b>9</b>   |            |            |

Reaction conditions are described in *Materials and Methods*. The results are expressed as % of the activity in controls minus detergent (~7 cpm/h/ $\mu$ g protein). The values are the mean of three estimations  $\pm$  SD of 10%. CHAPS, 3-[(3-cholamidopropyl)dimethylammonio]-1-propanesulfonate; CHAPSO, 3-[(3-cholamidopropyl)dimethylammonio]-2-hydroxy-1-propanesulfonate; SDS, sodium lauryl sulfate.

\*Critical micelle concentration (% w/v).

<sup>†</sup>N, nonionic; Z, Zwitterionic; A, anionic detergent.

<sup>‡</sup> ~500  $\mu$ g of protein in 60  $\mu$ l of reaction volume were used.
