# Supplementary material
Source: PubMed Central journal article supplement (PMC124356)
Supplement: pnas_102644799_2.pdf [file pnas_102644799_2.pdf]

Supporting information for Falk *et al.* (May 14, 2002) *Proc. Natl. Acad. Sci. USA*,  
10.1073/pnas.102644799.

**Table 2. Sequence of primers used for cloning xylosyltransferase (AtXT1) and other putative glycosyltransferase (AtGTs) genes from *Arabidopsis***

| Gene         | Forward primers                                                       | Reverse primers                                       |
|--------------|-----------------------------------------------------------------------|-------------------------------------------------------|
| <i>AtXT1</i> | 5'- <u>CGGGATCC</u> CATGCATCATCATCATCACTGC<br>GTGAAGATGATGAAGAAG-3'   | 5'- <u>TTCAGCTG</u> CCGATTCAAAC<br>TGATTGGTTTGTACC-3' |
| <i>AtGT2</i> | 5'- <u>CGGGATCC</u> CATGCATCATCATCATCACAAG<br>ATGATTGAGAGGTGTTTAGG-3' | 5'- <u>TTCAGCTG</u> ATATATCCTCTC<br>ACTCACTCAC -3'    |
| <i>AtGT3</i> | 5'-TTACAACAACAACAATGGCTCTT-3'                                         | 5'-CCGCTCGAGCTAGCTTCGTG<br>CTTCAATCTTGAG-3'           |
| <i>AtGT4</i> | 5'- <u>CGGGATCC</u> CATGCATCATCATCATCACCAG<br>GAGGCAACAAGTGAAATG-3'   | 5'- <u>TTCAGCTG</u> TTCTAGCTCTA<br>TGGTTTG-3'         |
| <i>AtGT5</i> | 5'-GCT <u>CTAGA</u> ATGCATCATCATCATCACAAA<br>ATGGGTCAAGATGGTTC-3'     | 5'- <u>TTCAGCTG</u> TCTCCTTGTGTT<br>CCTCTAGTTC-3'     |
| <i>AtGT6</i> | 5'- <u>CGGGATCC</u> CATGCATCATCATCATCACTCA<br>TCTCCGATGGGAAAAC-3'     | 5'- <u>TTCAGCTG</u> TCTTCTTGTGT<br>CTACA-3'           |

Restriction sites are underlined in the primer sequences.
